# Supplementary material
Source: PubMed Central journal article supplement (PMC3155245)
Supplement: NIHMS263020-supplement-1.pdf [file NIHMS263020-supplement-1.pdf]

**Supporting Information for:**

**Using a genetically targeted sensor to investigate the role of presenilin-1 in ER  
Ca<sup>2+</sup> levels and dynamics**

Janet E. McCombs <sup>1</sup>, Emily A. Gibson <sup>2</sup>, Amy E. Palmer <sup>1\*</sup>

Supplementary Methods

Supplementary Figure S1: **Demonstration of gamma-secretase activity in MEF cells.**

Supplementary Figure S2: **The effect of PS1 on ATP-induced ER Ca<sup>2+</sup> release.**

Supplementary Figure S3: **Analysis of calcium spiking data using IGOR Pro.**

## **Supplementary Methods**

### **Cloning and constructs**

To confirm gamma-secretase activity in individual cells, a fluorescently-tagged APP substrate (termed C99-mCherry) was designed. C99-mCherry was generated by PCR amplification of the APP signal sequence (residues 1 – 21) and its post  $\beta$ -secretase cleaved C-terminus (residues 653 – 751) from Gene Pool™ cDNA Human Normal Adult Brain library (Invitrogen). The signal sequence was ligated between HindIII and KpnI into the multiple cloning site of pcDNA3 (Invitrogen). The C99-APP fragment was subsequently ligated into the same vector between KpnI and NotI. The mCherry fluorescent protein was ligated into the APP-pcDNA3 vector between NotI and XbaI in order to tag the C-terminus of C99-APP.

### **A $\beta$ ELISA**

MEF cells were doubly transfected with full-length APP and PS1 mutants 72 hours prior to carrying out the assay and media was changed 18 hours post-transfection. Analysis was performed using the BetaMark x-40 and BetaMark x-42 ELISA Kits (Covance). Secreted A $\beta$  protein in the media was concentrated using Amicon Ultra 3K centrifugal filter devices (Millipore). Samples diluted 1:2 in working incubation buffer were run in duplicate according to manufacturer recommended protocol.

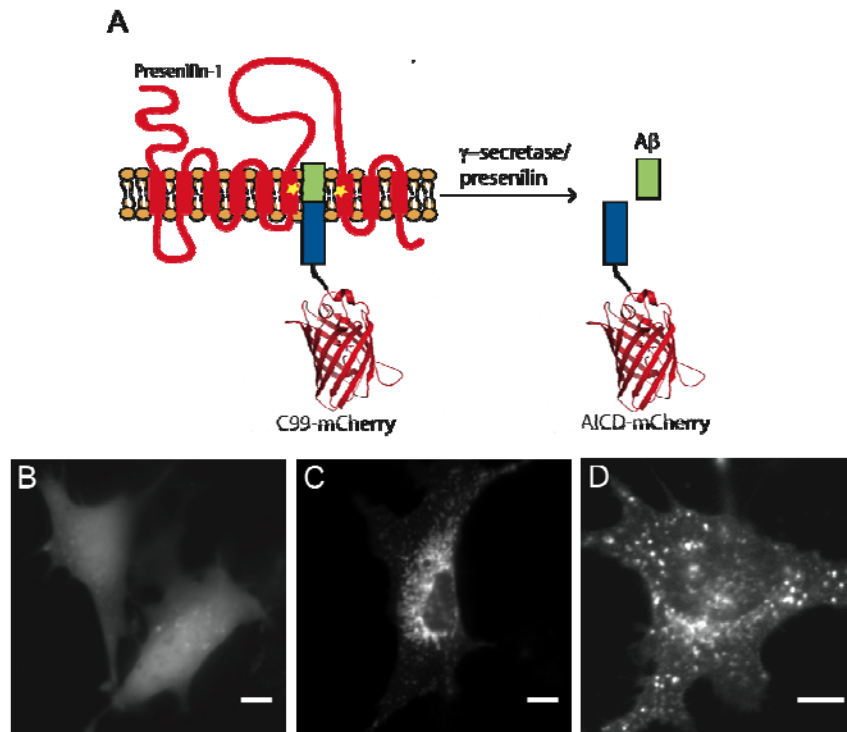

**Figure S1. Demonstration of gamma-secretase activity in MEF cells.** (A) Schematic representation of the C99-mCherry probe consisting of post- $\beta$ -secretase cleaved APP with the mCherry fluorophore on its C-terminus. Upon recognition by the gamma-secretase complex, PS cleaves the probe into its intracellular domain (AICD) and A $\beta$  fragments. (B) The C99-mCherry probe in WT MEF cells displaying diffuse cytosolic fluorescence. (C) WT MEF cells treated with the gamma-secretase inhibitor DAPT and expressing the C99-mCherry probe displaying punctate fluorescence. (D) DKO MEF cells expressing the C99-mCherry probe. Fluorescence is comparable to WT + DAPT cells, as there is no PS and thus no cleavage of the probe in cells. Scale bar is 10 $\mu$ m.

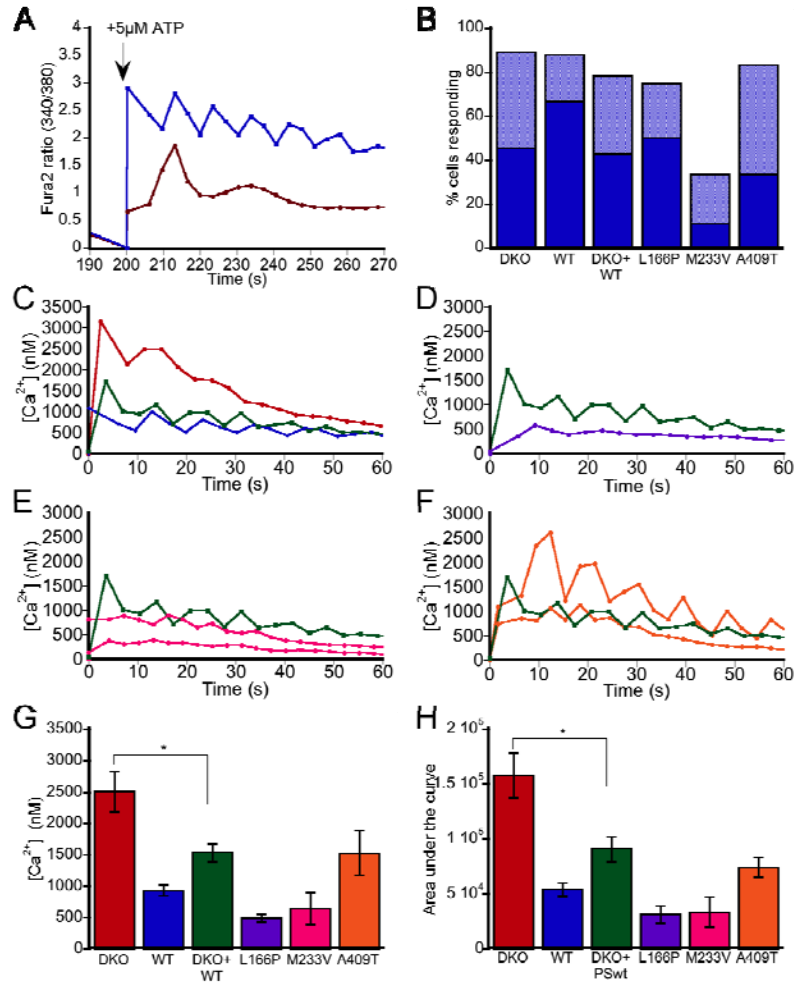

**Figure S2. The effect of PS1 on ATP-induced ER Ca<sup>2+</sup> release.** (A) Upon treatment with ATP, Ca<sup>2+</sup> release from cells either occurred immediately (blue) or displayed a noticeable delay (red), with a comparatively smaller Ca<sup>2+</sup> response. (B) Percent of responding cells that showed immediate (dark blue) or delayed (light blue) Ca<sup>2+</sup> release. Cells showed similar responsiveness (~ 80%) except for DKO + M233V, which had decreased ATP sensitivity. WT: n = 42; DKO: n = 56; DKO + WT: 14; L166P: n = 8; M233V: n = 18; A409T: n = 12. (C – F) Representative oscillation curves for the amount of Ca<sup>2+</sup> released in immediately responding cells for DKO (red), WT (blue) and DKO + WT (green); (D – F) Comparison of the amount of Ca<sup>2+</sup> released upon stimulation with ATP for DKO + WT (green) versus L166P (purple; D), M233V (pink; E), and A409T (orange; F). (G) Maximum [Ca<sup>2+</sup>] peak heights upon addition of 5μM ATP. Asterisk: *P* < 0.05, ANOVA with Student-Newman-Keuls post-hoc test. WT: n = 27; DKO: n = 25; DKO + WT: n = 6; L166P: n = 3; M233V: n = 2; A409T: n = 4. (H) Amount of Ca<sup>2+</sup> released from the ER upon ATP treatment. Data represent area under the oscillation curve. DKO cells released more Ca<sup>2+</sup> upon stimulation with ATP than DKO + WT, consistent with levels of ER Ca<sup>2+</sup>. However, though not significant, L166P appeared to release less Ca<sup>2+</sup> upon treatment with ATP though the ER concentration of Ca<sup>2+</sup> was similar to WT. M233V also appeared to release less Ca<sup>2+</sup> than WT, consistent with the lower level of ER Ca<sup>2+</sup>, though differences were not significant. Interestingly, the Ca<sup>2+</sup> response for the A409T mutant was similar to WT despite

this mutant having a lower ER  $\text{Ca}^{2+}$  load. Asterisk:  $P < 0.05$ , ANOVA with Student-Newman-Keuls post-hoc test. Error bars indicate SEM.

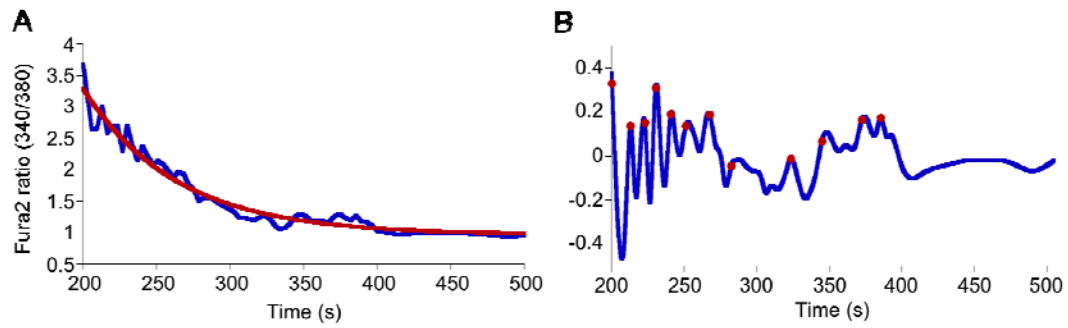

**Figure S3. Analysis of calcium spiking data using IGOR Pro.** (A) Representative curve (blue) fit to an exponential decay (red),  $A(t) = A_0 e^{-(t-t_0)^k}$ . (B) The exponential decay fit from A is subtracted from the data curve to enhance the peaks. Peak values (depicted by red dots) are determined using the Peak AutoFind macro in IGOR Pro.
